# Supplementary material for: Involvement of Transforming Growth Factor Beta Family Genes in Gonadal Differentiation in Japanese Eel, Anguilla japonica, According to Sex-Related Gene Expressions
Source: MDPI journal article supplement (doi:10.3390/cells10113007), 2021-11-04
Supplement: s1 [file s1]

AATCTCTCCCTCGTACTGTCTCACGCTTGCGGGACAGAAAAACAATGTG  
 AAATATTCCAAAGCCAACCTGGTGCATGAGCAGATAAAACCCAGGTTCC  
 CAGACTATGATGAAAAACAGTTTCTGCCATCGTTGGACGTACAGGCCCC  
 TGATTGTGAGTAGCGCACACGTCCAGCTTCCTCTTCGTCGAATCGTTCT  
 GAACCGGCGACGGCTTTGTAAACCAAGTCAAACCTGGGGGTGCCGATTG  
 TGTCTGTCTGCTGAATTGTCGCTCACAGCCTAACTGCGGAACCACA  
 1 **ATG**CTGTCTTCGCTGTGCATGATGGCCGCGATCTTTGGCTTTCCT  
 M L S S L C M M A A I F G F P  
 46 CTGAGAGAAGCGTTCGTCCTCCATCCCTCCCGAGAGGAGCCTGCA  
 L R E A F V L H P S R E E P A  
 91 GGAGCCATCTCAGACGTGCCGTTGGCAAGGTGAACAGATGCCAG  
 G A I S D V P V G K V N R C Q  
 136 GGGGAGTCACTTCAGGTCATAAAGCAGAAGCTGTTGGAGGCCCTG  
 G E S L Q V I K Q K L L E A L  
 181 AACCTGGGTAGGGAGCCTCAGGTTTCCAGGACTGGACTCGGCAGG  
 N L G R E P Q V S R T G L G R  
 226 TTTAGGGAGCAGTGGAAAGCGGTCTTAGGAGACACTGCCCACAGC  
 F R E Q W K A V L G D T A H S  
 271 TCACCGAAGTCTCAGGAATCCACTGTGTTGGATACAACCTCCACA  
 S P K S Q E S T V L D T T S T  
 316 CAAGAGTCCACTGGGACCCGAGATGAGACCAACAGTACAGGCTTG  
 Q E S T G T R D E T N S T G L  
 361 CAGTGCTGCCAGCTGGCTTCACAGATCTTCATAAACGATCTTGGT  
 Q C C Q L A S Q I F I N D L G  
 406 TGGGAGAACTGGATAATCTTTCCAGATACCTTCACCTACACCCAG  
 W E N W I I F P D T F T Y T Q  
 451 TGTGCAGTCTGCGACCCCCACCTGGACCCAAAAGCTCCAAAGTGT  
 C A V C D P H L D P K A P K C  
 496 CGAGCAAACAGCCCCCTGAGCCAAACACCCCTTCAAAGTGCTGC  
 R A N S P P E P N T P S K C C  
 541 CAGCCAACCTCCCATGTGATGGTGCCATTCTTCTACTTGGATGAG  
 Q P T S H V M V P F F Y L D E  
 586 CTCAACACGCCAGTCATCTCCTCTGTGGCCCTGACCAACCAATGT  
 L N T P V I S S V A L T N Q C  
 631 GGCTGCAAACAGGATCATACATCCAGGATGCACAGAACTGA  
 G C K P G S Y I Q D A Q N \*

Figure S1: Nucleotide and deduced amino acid sequences of *A. japonica* Gsdf. Start codon is shown in box.
