# Supplementary material for: Involvement of Transforming Growth Factor Beta Family Genes in Gonadal Differentiation in Japanese Eel, Anguilla japonica, According to Sex-Related Gene Expressions
Source: MDPI journal article supplement (doi:10.3390/cells10113007), 2021-11-04
Supplement: s1 [file s1]

|                      |                                 |                                               |            |                             |                             |                        |                           |                        |      |
|----------------------|---------------------------------|-----------------------------------------------|------------|-----------------------------|-----------------------------|------------------------|---------------------------|------------------------|------|
| A.anguilla, Amh      | CRLQPLSVSLK                     | ---SYVLEPATAAINN                              | CEGG       | CG-FPLA                     | ---EANNHAILLSHESQSG-QPLGRSP | CCVPLRY                | ---ADLQVVEL               | ---KGAGTEI-TIKPNMVAMR  | CCGR |
| A.japonica, Amh      | CRLQPLSVSLK                     | ---SYVLEPATAAINN                              | CEGG       | CG-FPLA                     | ---EANNHAILLSHESQSG-QPLGRSP | CCVPLRY                | ---ADLQVVEL               | ---KGAGTEI-TIKPNMVATRC | CCGR |
| M.cyprinoides, Amh   | CQLHSLTVSLK                     | ---KYVLNPPTTNIK                               | CQGA       | CS-FPLT                     | ---NTNNHVILLNSHWESG-FPLERPP | CCVVPDY                | ---EDLQVAEL               | ---DGAGTKI-SIKPNVVAKE  | CCGR |
| O.mykiss, Amh        | CRLHSLTVSLE                     | ---KYLLSPPEATIY                               | CQGV       | CS-FPLT                     | ---NGNNHAILLSNQISG-LALERSP  | CCVVPDY                | ---EDLKVVVEL              | ---DEHGTEI-CYKPNMVAKE  | CCGR |
| S.formosus, Amh      | CQLHPLTVSMD                     | ---KYLLSPSTAANN                               | CQGS       | CS-DLPLE                    | ---RITNHAMMLNHRNNG-LPLERGP  | CCVVPVEY               | ---EELCQAVL               | ---NSEGTEI-QYKPEMVAKE  | CCGR |
| O.niloticus, Amh     | CLKALTVSLT                      | ---KLLVGSSANINN                               | CHGS       | CT-FPLT                     | ---NGNNHAILLSNHIETG-NADERSP | CCVVPVAY               | ---EALQVVDW               | ---NADGTFI-SIKPDVAVER  | CCGR |
| O.latipes, Amh       | CLRLSLTVSFE                     | ---KLLGQPSSANINN                              | CRGV       | CS-FPLI                     | ---NGNNHAILLSHTESV-AEERAP   | CCVVPVAY               | ---DPLEVLDW               | ---NDEGSFL-SIKPDMIARE  | CCGR |
| X.tropicalis, AMH    | CRLQELTISLKPFAEYKQDVLPEEININ    |                                               | CVGR       | CR-FPQTTQ                   | NDYQTHVLLIQLQERSQSGLARPP    | CCVVPVRY               | ---EEQWLMVV               | ---EENGIRI-QSYPNMVAKE  | CCGR |
| G.gallus, AMH        | CRLQELTIDLR                     | ---DRNFIVMPTVYAANN                            | CEGG       | CR-LPLSTRVP                 | PGYHSHTVLLGQMERG-SPLQRAP    | CCVVPVRY               | ---SDQLITSV               | ---SAEGLEV-RKFPMVAE    | CCGR |
| L.chalumnae, AMH     | CLRLRELNVDSL                    | ---HETFIQVPEKEYLAN                            | CAGH       | CG-LPMSDQNKYN               | SHVILLMKMQERGMN-LKRN        | CCVVPVKY               | ---SGLFVSFR               | ---IENGLEL-SLYPNMVAED  | CCGR |
| H.sapiens, AMH       | CALRELSVDLRA                    | ---ERSVLIPETYQAN                              | CQGV       | CG-WPQSDRNP                 | FRYGNHVLLLMQVYRG-AALARPP    | CCVPTAY                | ---AGKLLISL               | ---SEERISA-HHVPNMVATE  | CCGR |
| M.musculus, AMH      | CALRELSVDLRA                    | ---ERSVLIPETYQAN                              | CQGA       | CA-WPQSDRNP                 | FRYGNHVLLLMQVYRG-AALGRLP    | CCVPTAY                | ---AGKLLISL               | ---SEERISA-HHVPNMVATE  | CCGR |
| M.cyprinoides, Gdf5  | CHRKQLHVNFKEMGWDDWIIAPLEYEAYH   | CGVC                                          | CO-FPIRSHL | EPTNHAIQTLM                 | ---NSMDPDSTPPT              | CCVPTRL                | ---SPISILYI               | ---DSANNVVKYQYEDMVVES  | CCGR |
| O.mykiss, Gdf5       | CHRKQLHVNFKEMGWDDWIIAPLEYEAYH   | CGVC                                          | CO-FPIRSHL | EPTNHAIQTLM                 | ---NSMDPDSTPPT              | CCVPTRL                | ---SPISILYI               | ---DSANNVVKYQYEDMVVES  | CCGR |
| P.kingsleyae, Gdf5   | CHRKQLHVNFKEMGWDDWIIAPLEYDAFH   | CGVC                                          | CE-FPIRSHL | EPTNHAIQTLM                 | ---NSMDPDSTPPT              | CCVPTRL                | ---SPISILYI               | ---DSANNVVKYQYEDMVVES  | CCGR |
| O.niloticus, Gdf5    | CHRRRLHVNFKEMGWDDWIIAPLEYDAYH   | CGGA                                          | CO-FPIRSHL | EPTNHAIQTLM                 | ---NSMDPESTPPT              | CCVPTRL                | ---SPISILYI               | ---DSANNVVKYQYEDMVVES  | CCGR |
| O.latipes, Gdf5      | CHRKHLHVNFKEMGWDDWIIAPLEYDAFH   | CSGC                                          | CO-FPIRSHL | EPTNHAIQTLM                 | ---NSMDPKSTPPT              | CCVPTRL                | ---SPISILYI               | ---DSANNVVKYQYEDMVVES  | CCGR |
| A.anguilla, Gdf5     | CHRRQLHVNFKEMGWDDWIIAPLEYEAYH   | CEGA                                          | CO-FPIRSHL | EPTNHAIQTLM                 | ---NSMDPDSTPPT              | CCVPTRL                | ---SPISILYI               | ---DSANNVVKYQYEDMVVES  | CCGR |
| H.sapiens, GDF5      | CHRKALHVNFKDMGWDDWIIAPLEYEAFH   | CEGI                                          | CE-FPLRSHL | EPTNHAVIQTLM                | ---NSMDPESTPPT              | CCVPTRL                | ---SPISILFI               | ---DSANNVVKYQYEDMVVES  | CCGR |
| M.musculus, GDF5     | CHRKALHVNFKDMGWDDWIIAPLEYEAFH   | CEGI                                          | CE-FPLRSHL | EPTNHAVIQTLM                | ---NSMDPESTPPT              | CCVPTRL                | ---SPISILFI               | ---DSANNVVKYQYEDMVVES  | CCGR |
| G.gallus, GDF5       | CHRKALHVNFKDMGWDDWIIAPLEYEAYH   | CEGI                                          | CE-FPLRSHL | EPTNHAVIQTLM                | ---NSMDPESTPPT              | CCVPTRL                | ---SPISILFI               | ---DSANNVVKYQYEDMVVES  | CCGR |
| L.chalumnae, GDF5    | CHRKALHVNFKDMGWDDWIIAPLEYEAYH   | CEGI                                          | CE-FPLRSHL | EPTNHAVIQTLM                | ---NSMDPESTPPT              | CCVPTRL                | ---SPISILYI               | ---DSANNVVKYQYEDMVVES  | CCGR |
| X.tropicalis, GDF5   | CHKKPLHVNFKDMGWDDWIIAPLEYEAYH   | CEGI                                          | CE-FPLRSHL | EPTNHAVIQTLM                | ---NSMDPETTPPT              | CCVPTRL                | ---SPISILYT               | ---DSANNVVKYQYEDMVVES  | CCGR |
| M.cyprinoides, Tgfb1 | CCVRKLYIDFRKDLGKWKIHKPKGYHAN    | CMGS                                          | CTYI       | ---WNAENKYSQILALYKHHNPGASAP | CCVPOVL                     | ---EPLPILYY            | ---VGRQHKV-EQLSNMIVKSC    | CKCS                   |      |
| O.mykiss, Tgfb1      | CCVRKLYIDFRKDLGKWKIHKPKGYHAN    | CMGS                                          | CTYI       | ---WNAENKYSQILALYKHHNPGASAP | CCVPOVL                     | ---EPLPILYY            | ---VGRQHKV-EQLSNMIVKSC    | CKCS                   |      |
| O.niloticus, Tgfb1   | CCCLKLYIDFRKDLGKWKIHKPTGYHAN    | CMGS                                          | CTYI       | ---WDAENKYSQILALYKHHNPGASAP | CCAPQTL                     | ---EPLPIIYY            | ---VGRQHKV-EQLSNMIVKSC    | CKCS                   |      |
| A.anguilla, Tgfb1    | CCSVRLYIDFRKDLGKWKIHEPAGYHAN    | CMGS                                          | CTYI       | ---WNAENKYSQILALYKHHNPGASAP | CCVPOVL                     | ---EPLPILYY            | ---VGRQHKV-EQLSNMIVKSC    | CKCS                   |      |
| O.latipes, Tgfb1     | CCMQSLYIDFRKDLGKWKIHKPTGYHAN    | CKGS                                          | CSYI       | ---WNAENKYSQILALYKHHNPGASAP | CCVPOTL                     | ---EPLPILYY            | ---VGRQHKV-EQLSNMIVKSC    | CKCS                   |      |
| H.sapiens, TGFb1     | CCVRQLYIDFRKDLGKWKIHEPKGYHAN    | CLGH                                          | CPYI       | ---WSLDQYSKVLALYNQHNPGASAP  | CCVPOAL                     | ---EPLPIVYY            | ---VGRKPKV-EQLSNMIVKSC    | CKCS                   |      |
| M.musculus, TGFb1    | CCVRQLYIDFRKDLGKWKIHEPKGYHAN    | CLGH                                          | CPYI       | ---WSLDQYSKVLALYNQHNPGASAP  | CCVPOAL                     | ---EPLPIVYY            | ---VGRKPKV-EQLSNMIVKSC    | CKCS                   |      |
| L.chalumnae, TGFb1   | CCVRPLYIDFRKDLGKWKIHEPKGYHAN    | CMGI                                          | CPYI       | ---WSMDQYSKVLALYNQHNPDASAP  | CCVPOVL                     | ---EPLPILYY            | ---VGRQAKV-EQLSNMIVKSC    | CKCS                   |      |
| G.gallus, TGFb1      | CCVRPLYIDFRKDLGKWKIHEPKGYMAN    | CMGI                                          | CPYI       | ---WSADQYTKVLALYNQHNPGASAP  | CCVPOTL                     | ---EPLPIIYY            | ---VGRNVV-EQLSNMIVKSC     | CKCS                   |      |
| X.tropicalis, TGFb1  | CCVVKPLYINFRKDLGKWKIHEPKGYEANY  | CLGN                                          | CPYI       | ---WSTDQYSKVLALYNQHNPGASAP  | CCVPOVL                     | ---EPLPIIYY            | ---VGRNAKV-EQLSNMIVKSC    | CKCS                   |      |
| A.japonica, Gsdf     | CCQLASQIFINDLGWENWIFPDFTFTYTQ   | C-AVCO                                        | ---        | PHLDPKAPKCRANSPEPNTPSK      | CCQPTSH                     | ---VMVPPFFYL           | ---DELNTPVISSVA           | ---LTNQCSCK            |      |
| A.anguilla, Gsdf     | CCQLASQIFINDLGWENWIFPDFTFTYTQ   | C-AVCO                                        | ---        | PHLDPKAPKCRANSPEPNTPSK      | CCQPTSH                     | ---VMVPPFFYL           | ---DELNTPVISSVA           | ---LTNQCSCK            |      |
| M.cyprinoides, Gsdf  | CCQLVLSQIFIDLGWENWVVIYPTFTYTQ   | C-TVCT                                        | ---        | PNLDLTVPYRTHSPPEPTSSK       | CCQPTSQ                     | ---ELVPIFYM            | ---DEFNLTVISSVH           | ---LARGCSCK            |      |
| O.mykiss, Gsdf       | CCPLASQIFLKDGLWENWVIYPTFTYTQ    | C-SICK                                        | ---        | SRLDLSPSRCPSPHAPPAQDTPSQMP  | CCQTTST                     | ---EHVPPFLYM           | ---DEFSTLTIPSQV           | ---LTRACPSG            |      |
| O.niloticus, Gsdf    | CCSIASEIFMKDLGWDNWIHPLSLTYVQ    | C-AICN                                        | ---        | SAMTTVQCPSSQVNVQDANTQDQVP   | CCRPTSQ                     | ---EEVPIVYM            | ---DGSIAIVMSSMQ           | ---LTRSCICE            |      |
| O.latipes, Gsdf      | CCSMQAEVFMKDLGWDNWIHPLSLTIIDFC  | C-AICN                                        | ---        | SSDQTAQCPAAHDGQVQIRGSQDQAS  | CCCKPTSL                    | ---EIVPIVFM            | ---DETSTVISSVQ            | ---LARGCSCK            |      |
| L.oculatus, Inha     | CHRAELNISFEELGWDNWIHVPKVFTFYI   | CHGN                                          | CS         | ---SWDRMTTILGMKQ            | CCAPVPG                     | ---TMSRLRFRITTS        | ---DGGYSFKYETLPNIIAED     | CCICI                  |      |
| A.spatula, Inha      | CHRAELNISFEELGWDNWIHVPKVFTFYI   | CHGN                                          | CS         | ---SWDRMTTILGMKQ            | CCAPVPG                     | ---TMSRLRFRITTS        | ---DGGYSFKYETLPNIIAED     | CCICI                  |      |
| M.cyprinoides, Inha  | CHREELNISFQELGWDNWIHVPKVFTFYI   | CHGN                                          | CS         | ---SWDRMTTILGIKQ            | CCTPVPG                     | ---TMKSLRFRITTS        | ---DGGYSFKYETLPNIIAED     | CCICI                  |      |
| P.kingsleyae, Inha   | CHREELNISFADLGWENWIHVPKVFTFYI   | CHGN                                          | CS         | ---SWNRMTTLLGIKQ            | CCAPLPG                     | ---TMKSLRFRITTS        | ---DGGYSFKYETLPNIIAED     | CCICI                  |      |
| O.niloticus, Inha    | CHRAEIDISFEELGWDNWIHVPKVLFTFYI  | CHGN                                          | CS         | ---GGDRITAMLGITQ            | CCAPVPG                     | ---TMSRLRITTS          | ---DGGYSFKYETLPNIIAED     | CCICI                  |      |
| A.ruthenus, Inha     | CHRMELNISFEELGWDNWIHVPRAFTFYH   | CHGN                                          | CS         | ---NTERMTTFLGIKQ            | CCAPVPG                     | ---TMKSLKFRITTS        | ---DGGYSFKYETLPNIIAED     | CCICI                  |      |
| P.spathula, Inha     | CHRMALNISLEELGWDNWIHVPRAFTFYH   | CHGN                                          | CS         | ---SREHMTTYLGIKQ            | CCAPVPG                     | ---TMKSLKFRITTS        | ---DGGYSFKYETLPNIIAED     | CCICI                  |      |
| A.anguilla, Inha     | CHREELNISFQELGWDNWIHVPKVFTFYH   | CHGN                                          | CS         | ---SQDRITTMLGIRQ            | CCAPVPG                     | ---TMKPLRVRTTS         | ---DRGYSVKYETLPNIIAED     | CCICI                  |      |
| O.latipes, Inha      | CJRGGEISFEELGWDNWIHVPKVTFTFYI   | CHGN                                          | CS         | ---AADRTTAMLGMSQ            | CCAPVHG                     | ---SMRSLKVTTS          | ---DGGYSFKLETLPNIIPEEC    | CCICI                  |      |
| O.mykiss, Inha       | CJRETINISFQELGWDNWIHVPKVLNFYI   | CHGN                                          | CS         | ---ALDRTTAMLGIRQ            | CCAPVPG                     | ---TMSRLRFTTS          | ---DGGYSFKYETLPNIIPEEC    | CCICI                  |      |
| S.formosus, Inha     | CRRTTELNISFEDLGWDNWIHVPKVLFTFSI | CHGN                                          | CT         | ---SRDRVTTVLGLRQ            | CCAPVPE                     | ---TMKSLHFHTTS         | ---DGGYSFKYETLPNIIAED     | CCICI                  |      |
| M.cyprinoides, Bdnf  | SRRGELSVCDSI                    | ---SQWVTAVDKKTAIDMSGQTVTVLEKVPVPNGQLKQYFYETK  |            |                             |                             | CNPMGYTKDGCGRGIDKRHYSQ | CRRTQSYVRALTMDSKKIGWRFRIR | ---IDTSCVCT            |      |
| A.anguilla, Bdnf     | SRRGELSVCDSI                    | ---SQWVTAVDKKTAIDMSGQTVTVLEKVPVPNGQLKQYFYETK  |            |                             |                             | CNPMGYTKDGCGRGIDKRHYSQ | CRRTQSYVRALTMDSKKIGWRFRIR | ---IDTSCVCT            |      |
| O.mykiss, Bdnf       | SRRGELSVCDSI                    | ---SQWVTAVDKKTAIDMSGQTVTVLEKVPVPNGQLKQYFYETK  |            |                             |                             | CNPMGYTKDGCGRGIDKRHYSQ | CRRTQSYVRALTMDSKKIGWRFRIR | ---IDTSCVCT            |      |
| P.kingsleyae, Bdnf   | ARRGELSVCDSI                    | ---SQWVTAVDKKTAIDMSGQTVTVLEKVPVPNGQLKQYFYETK  |            |                             |                             | CNPMGYTKDGCGRGIDKRHYSQ | CRRTQSYVRALTMDSKKIGWRFRIR | ---IDTSCVCT            |      |
| O.latipes, Bdnf      | SRRGELSVCDSI                    | ---SQWVTAVDKKTAIDMSGQTVTVMEKVPVPNGQLKQYFYETK  |            |                             |                             | CNPMGYTKDGCGRGIDKRHYSQ | CRRTQSYVRALTMDSKKIGWRFRIR | ---IDTSCVCT            |      |
| O.niloticus, Bdnf    | SRRGELSVCDSI                    | ---SQWVTAVDKKTAIDMSGQTVTVMEKVPVPNGQLKQYFYETK  |            |                             |                             | CNPMGYTKDGCGRGIDKRHYSQ | CRRTQSYVRALTMDSKKIGWRFRIR | ---IDTSCVCT            |      |
| H.sapiens, BDNF      | ARRGELSVCDSI                    | ---SEWVTAAADKKTAIDMSGQTVTVLEKVPVPNGQLKQYFYETK |            |                             |                             | CNPMGYTKDGCGRGIDKRHYSQ | CRRTQSYVRALTMDSKKIGWRFRIR | ---IDTSCVCT            |      |
| M.musculus, BDNF     | ARRGELSVCDSI                    | ---SEWVTAAADKKTAIDMSGQTVTVLEKVPVPNGQLKQYFYETK |            |                             |                             | CNPMGYTKDGCGRGIDKRHYSQ | CRRTQSYVRALTMDSKKIGWRFRIR | ---IDTSCVCT            |      |
| L.chalumnae, BDNF    | ARRGELSVCDSI                    | ---SEWVTAAADKKTAIDMSGQTVTVLEKVPVPNGQLKQYFYETK |            |                             |                             | CNPMGYTKDGCGRGIDKRHYSQ | CRRTQSYVRALTMDSKKIGWRFRIR | ---IDTSCVCT            |      |
| G.gallus, BDNF       | ARRGELSVCDSI                    | ---SEWVTAAEKKTAIDMSGQTVTVLEKVPVPNGQLKQYFYETK  |            |                             |                             | CNPMGYTKDGCGRGIDKRHYSQ | CRRTQSYVRALTMDSKKIGWRFRIR | ---IDTSCVCT            |      |
| X.tropicalis, BDNF   | ARRGELSVCDSI                    | ---SEWVTAAANKKTAIDMSGQTVTVLEKVPVPNGQLKQYFYETK |            |                             |                             | CNPMGYTKDGCGRGIDKRHYSQ | CRRTQSYVRALTMDSKKIGWRFRIR | ---IDTSCVCT            |      |

TGFB domain

NGF domain

TGFB domain

NGF domain

Figure S2: Alignment of 50 TGF- $\beta$  domain and 11 NGF domain amino acid sequences used in the phylogeny analysis (in Figure 3). Multiple alignment of TGF- $\beta$  domain (transforming growth factor-beta family) of Amh, Gdf5, Gsdf, Inha and Tgfb1; and NGF domain (nerve growth factor) sequences of Bdnf. Conserved amino acids of the cysteine knot of TGF- $\beta$  domain are boxed.
